# Supplementary material for: Present and Future: Pharmacologic Treatment of Obesity
Source: Hindawi journal article supplement (doi:10.1155/2011/636181), 2011-01-01
Supplement: f1 [file 636181.f1.pdf]

| Drug                                                       | Mechanism of Action                                                                                   | Amount of weight lost              | Side effects                                             |
|------------------------------------------------------------|-------------------------------------------------------------------------------------------------------|------------------------------------|----------------------------------------------------------|
| <u>Drugs for long term use</u>                             |                                                                                                       |                                    |                                                          |
| Orlistat                                                   | Lipase inhibitor                                                                                      | 1.7-5%                             | Steatorrhea, fecal urgency, and flatus                   |
| Sibutramine (no longer approved)                           | Central noradrenaline and serotonin reuptake inhibitor                                                | 4.6%                               | Increased BP, insomnia, dry mouth, nausea, constipation  |
| <u>Drugs for short term use</u>                            |                                                                                                       |                                    |                                                          |
| Phentermine                                                | Central release of dopamine and noradrenaline                                                         | 10.1-11.1%                         | Insomnia, dry mouth, constipation                        |
| Diethylpropion (now shown safe for up to one year)         | Central release of dopamine and noradrenaline                                                         | 10.1-11.1%                         | Insomnia, dry mouth, constipation                        |
| Phendimetrazine                                            | Central release of dopamine and noradrenaline                                                         | 10.1-11.1%                         | Insomnia, dry mouth, constipation                        |
| Benzphetamine                                              | Central release of dopamine and noradrenaline                                                         | 10.1-11.1%                         | Insomnia, dry mouth, constipation                        |
| <u>Diabetic medications that lead to weight loss</u>       |                                                                                                       |                                    |                                                          |
| Metformin                                                  | Decreases hepatic glucose production and intestinal glucose absorption, increases insulin sensitivity | 4.5%                               | Nausea, abdominal pain, diarrhea, lactic acidosis        |
| Exenatide                                                  | GLP-1 receptor agonist                                                                                | 4.4%                               | Headache, nausea, vomiting                               |
| Liraglutide                                                | GLP-1 receptor agonist                                                                                | mean of 2.8kg                      | Nausea, vomiting, and diarrhea                           |
| Pramlintide                                                | Amylin analogue                                                                                       | 3.7-5%                             | Nausea, vomiting or headaches                            |
| <u>Anti-seizure medications that lead to weight loss</u>   |                                                                                                       |                                    |                                                          |
| Topiramate                                                 | Enhances GABA-activated chloride channels                                                             | 3.7-4.5%                           | Fatigue, paresthesias, metabolic acidosis                |
| Zonisamide                                                 | Blocks sodium and calcium channels, also dopaminergic and serotonergic activity                       | 5.6%                               | Cognitive effects, fatigue, increase in serum creatinine |
| <u>Antidepressant medications that lead to weight loss</u> |                                                                                                       |                                    |                                                          |
| Bupropion                                                  | Dopamine and norepinephrine reuptake inhibitors                                                       | 2.2-5.1%                           | Dry mouth, constipation, headaches                       |
| Fluoxetine                                                 | Serotonin reuptake inhibitor                                                                          | from 14.5 kg lost to 0.4 kg gained | Insomnia, headaches, anxiety                             |
|                                                            |                                                                                                       |                                    |                                                          |
